# Supplementary material
Source: PubMed Central journal article supplement (PMC3309781)
Supplement: 1114919109_pnas.201114919SI.pdf [file 1114919109_pnas.201114919SI.pdf]

# Supporting Information

Luzzadder-Beach et al. 10.1073/pnas.1114919109

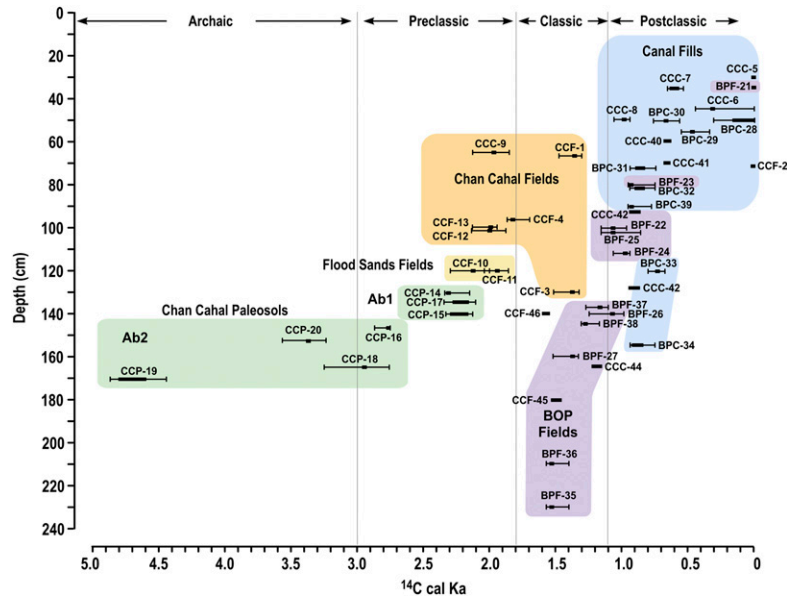

Fig. S1. Radiocarbon dates by depth (cm) and stratigraphic unit. <sup>14</sup>C cal K<sub>ar</sub>, calibrated BP; CCC, Chan Cahal canals; CCF, Chan Cahal fields; CCP, Chan Cahal paleosols; BPF, BOP fields; BPC, BOP canals.
